# Supplementary material for: MoO3 subnanoclusters on ultrasmall mesoporous silica nanoparticles: an efficient catalyst for oxidative desulfurization
Source: Royal Society of Chemistry journal article supplement (doi:10.1039/c7ra08566d), 2017-01-01
Supplement: c7ra08566d1.pdf [file c7ra08566d1.pdf]

*Supporting Information for:*

**MoO<sub>3</sub> Subnanoclusters on Ultrasmall Mesoporous Silica  
Nanoparticles: An Efficient Catalyst for Oxidative Desulfurization**

*Jiasheng Wang, Wenpei Wu, Hongyang Ye, Yahong Zhao, Wan-Hui Wang, Ming Bao \**

State Key Laboratory of Fine Chemicals, School of Petroleum and Chemical Engineering, Dalian  
University of Technology, Panjin 124221, China

Corresponding Author

E-mail: [mingbao@dlut.edu.cn](mailto:mingbao@dlut.edu.cn)

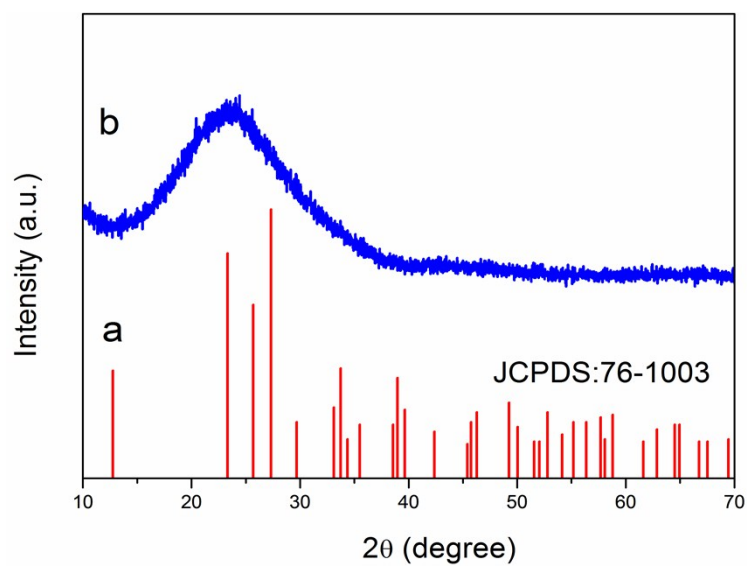

**Figure S1.** (a) The JCPDS card of  $\text{MoO}_3$ ; (b) the XRD pattern of subnano- $\text{MoO}_3/\text{UMSN}$ .

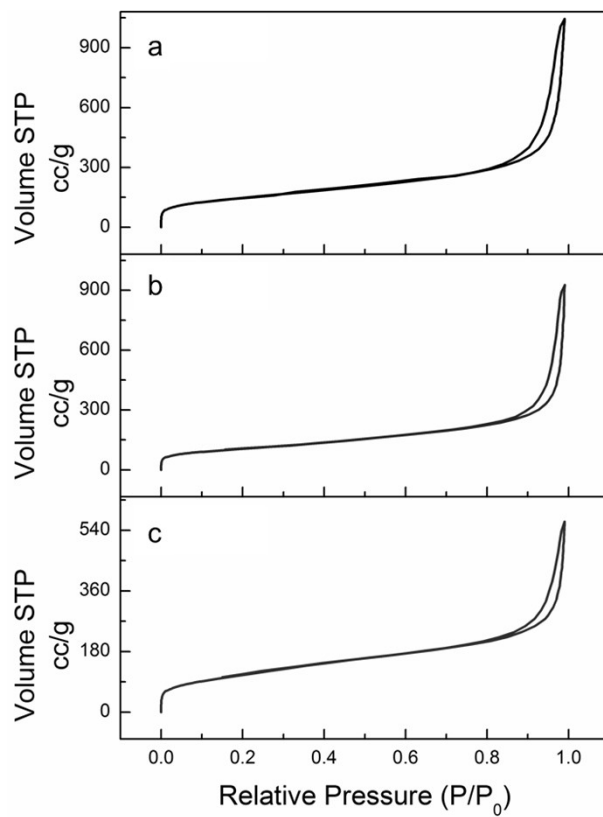

**Figure S2.**  $\text{N}_2$  adsorption-desorption isotherms of catalyst (a) C-1, (b) C-2, and (c) C-3.

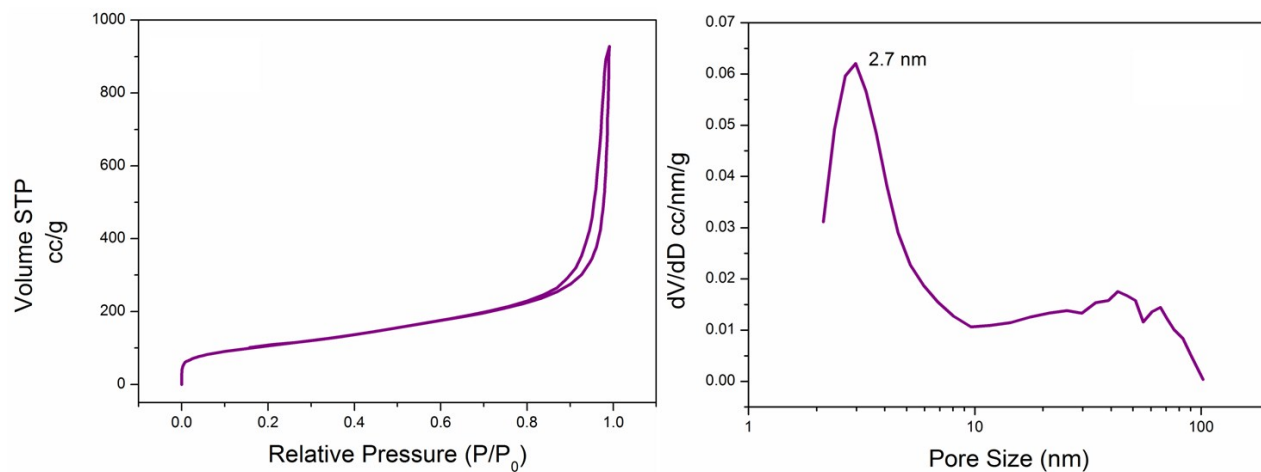

**Figure S3.** N<sub>2</sub> adsorption-desorption isotherm and pore size distribution of meso-SiO<sub>2</sub>.

<sup>1</sup>H NMR (500 MHz, Chloroform-*d*) δ 7.82 (dd, *J*= 14.7, 7.6 Hz, 4H), 7.65 (td, *J*= 7.6, 1.2 Hz, 2H), 7.54 (td, *J*= 7.6, 1.0 Hz, 2H).

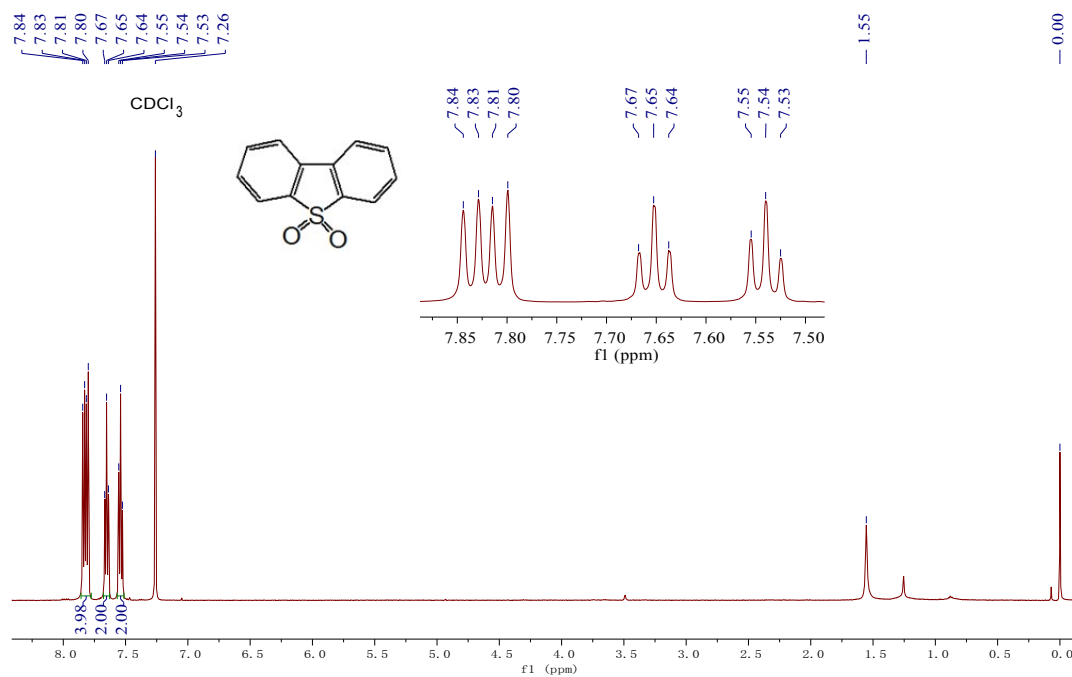

**Figure S4.** The <sup>1</sup>H NMR spectrum of DBTO<sub>2</sub>.

**Table S1.** ODS conversion of different substrates catalyzed by C-1.<sup>a</sup>

| Entry | Substrate                                                                         | DBT conversion% |
|-------|-----------------------------------------------------------------------------------|-----------------|
| S1    | 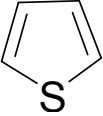 | 99.2            |
| S2    |  | 99.6            |
| S3    |  | 100             |

a: [cat.]/[S] = 0.075, [O]/[S] = 6, 70 °C, 15 min.

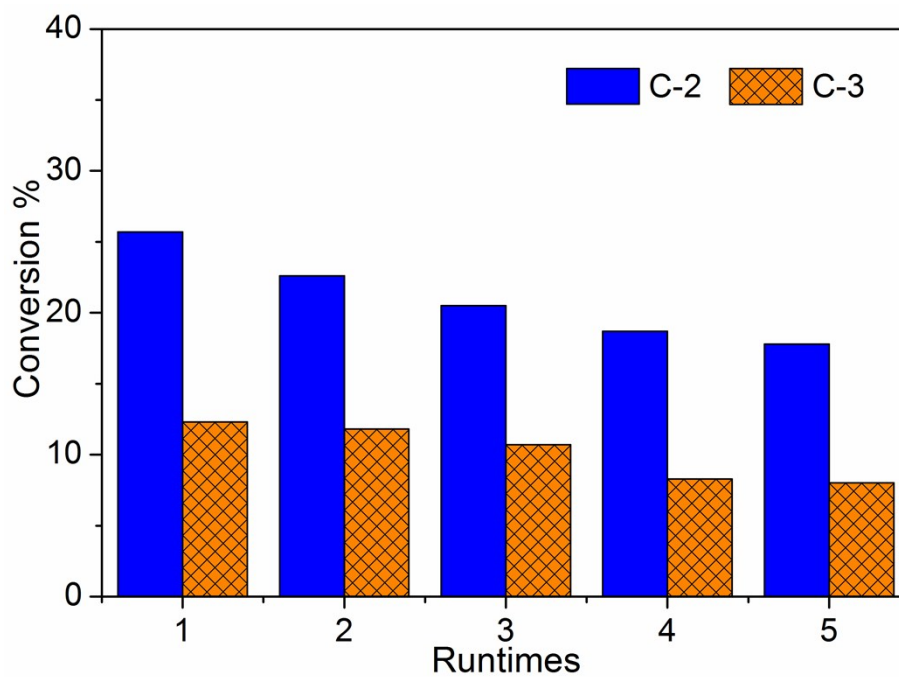

**Figure S5.** The variation of DBT conversion with runtimes for C-2 and C-3.
